# Supplementary material
Source: Springer Nature journal article supplement (https://www.springermedizin.de/resource/supplementary/12893_2013_573_MOESM1_ESM.pdf/9512114)
Supplement: MOESM1 [file 9512114]

## 6. Patient's prognosis

Medical reasons

Non-medical reasons

1. Medical history

2. Organ macroscopy

3. Trust in recovery team

4. Local capacity

5. Decisions of other centers

## 7. Strategic considerations
